# Supplementary material for: Facile synthesis of a SiOx/asphalt membrane for high performance lithium-ion battery anodes
Source: Royal Society of Chemistry journal article supplement (doi:10.1039/c7cc05816k), 2017-01-01
Supplement: c7cc05816k1.pdf [file c7cc05816k1.pdf]

## Supporting Information For

### **Facile synthesis of SiO<sub>x</sub>/asphalt membrane for high performance lithium-ion battery anode**

*Quan Xu,<sup>ab†</sup> Jian-Kun Sun,<sup>ab†</sup> Ge Li,<sup>ab</sup> Jin-Yi Li,<sup>ab</sup> Ya-Xia Yin<sup>ab\*</sup> and Yu-Guo Guo<sup>ab\*</sup>*

<sup>a</sup>. CAS Key Laboratory of Molecular Nanostructure and Nanotechnology, and Beijing National Laboratory for Molecular Sciences, CAS Research/Education Center for Excellence in Molecular Sciences, Institute of Chemistry, Chinese Academy of Sciences (CAS), Beijing 100190, P.R. China.

<sup>b</sup>. School of Chemistry and Chemical Engineering, University of Chinese Academy of Sciences, Beijing 100049, P.R. China.

\*Corresponding author: yxyin@iccas.ac.cn, ygguo@iccas.ac.cn.

† These authors contributed equally to this work.

## Experimental section

### *Materials synthesis*

Unless otherwise specified, all materials used in the experiment were of analytical grade, and were used without any pretreatment.  $\text{SiO}_x$  powders were purchased from Hengshui Chaofan New Energy Materials Co. Ltd. Emulsified asphalt was composed of asphalt (60 wt%), water and emulgator. The porous microspheres were synthesized through a combined process of ball-milling and spray drying. Firstly,  $\text{SiO}_x$  powders (150 g) and water (850 g) were added into ball mill, followed by ball milling 6 h under  $\text{N}_2$  atmosphere and low temperature (10 °C) to fabricate nano-sized  $\text{SiO}_x$  particles. Then, the slurry was utilized to produce porous  $\text{SiO}_x$  particles by spray drying process. The detailed parameters were presented as follows: inlet temperature (190 °C), outlet temperate (100 °C), feeding speed (5 L h<sup>-1</sup>) and rotate speed of nebulizer (30000 r min<sup>-1</sup>). The obtained  $\text{SiO}_x$  microspheres (20 g) were dispersed in water (15 mL) and ethyl alcohol (10 mL) under stirring. Then the  $\text{SiO}_x$  aqueous was mixed with emulsified asphalt aqueous (17 g) to prepare  $\text{SiO}_x$ /asphalt composite.  $\text{SiO}_x$ /asphalt membrane was obtained by hot pressing  $\text{SiO}_x$ /asphalt composite at 80 °C. The resultant  $\text{SiO}_x$ /C@Ni binder-free anodes were fabricated by preforming  $\text{SiO}_x$ /asphalt membrane and nickel foam and high-temperature pyrolysis process.  $\text{SiO}_x$ /C composites were prepared by carbonizing  $\text{SiO}_x$ /asphalt membrane. All high-temperature pyrolysis process was performed under Ar atmosphere at 900 °C for 3h.  $\text{SiO}_x$ /C/G composites were composed of  $\text{SiO}_x$ /C and artificial graphite with the mass ratio of 7: 13. For comparison,  $\text{SiO}_x$ /G anodes with the mass ratio of 1: 3 presented the same reversible capacities with  $\text{SiO}_x$ /C/G anodes.

### *Characterizations*

The morphologies of all materials were investigated by a field-emission SEM (JEOL 6701F). XRD patterns were collected by a Rigaku D/max 2500 diffractometer using Cu K $\alpha$  radiation. Raman spectra was obtained using a Digilab FTS3500 system. Thermogravimetric (TG) analysis was performed on a TA-Q60 instrument from 50 °C to 1000 °C at a heating rate of 5 °C min<sup>-1</sup> under air. The electrochemical performance of anodes was investigated using CR2032 coin cell, which was composed of Li foil as

the counter electrode, a celgard 2500 as separator, electrolyte (1M LiPF<sub>6</sub> in a mixture of ethylene carbonate (EC) diethyl carbonate (DEC) and dimethyl carbonate (DMC) (1:1:1, by volume) containing 5% fluoroethylene carbonate (FEC)) and the working electrode. For binder-free anodes, SiO<sub>x</sub>/C@Ni was used as the working electrode. For other anodes, the working electrode was prepared through coating a homogeneous slurry consisting of active materials, Super P, sodium carboxymethyl cellulose (CMC) and styrene butadiene rubber (SBR) at a mass ratio of 90:5:2.5:2.5 on the C-coated copper foil, and then dried in a vacuum oven at 60 °C for 12 h. For SiO<sub>x</sub> anodes, the mass ratio of active materials, Super P, CMC and SBR was 80:10:5:5. The mass loading of all active material was ~3 mg cm<sup>-2</sup>. The charge and discharge measurements were performed between the voltage range of 0.005-2.0 V vs. Li<sup>+</sup>/Li.

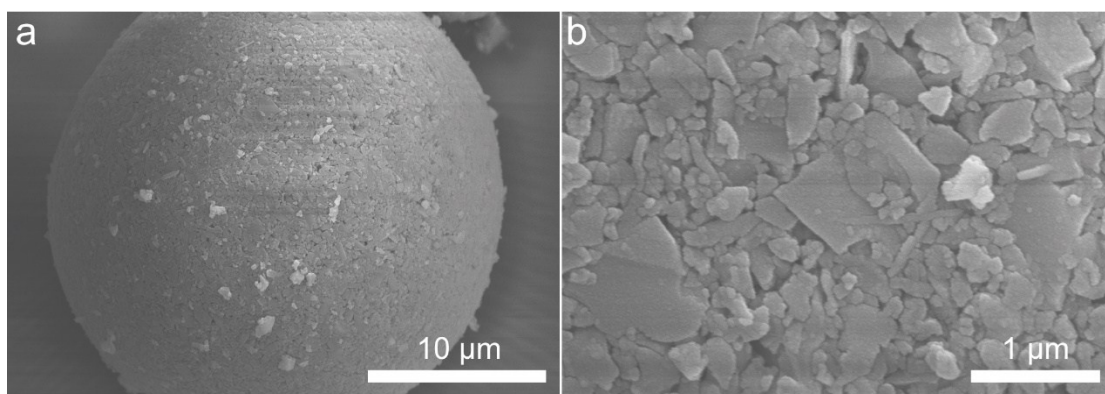

Fig. S1 The high magnification SEM images of porous SiO<sub>x</sub> microspheres.

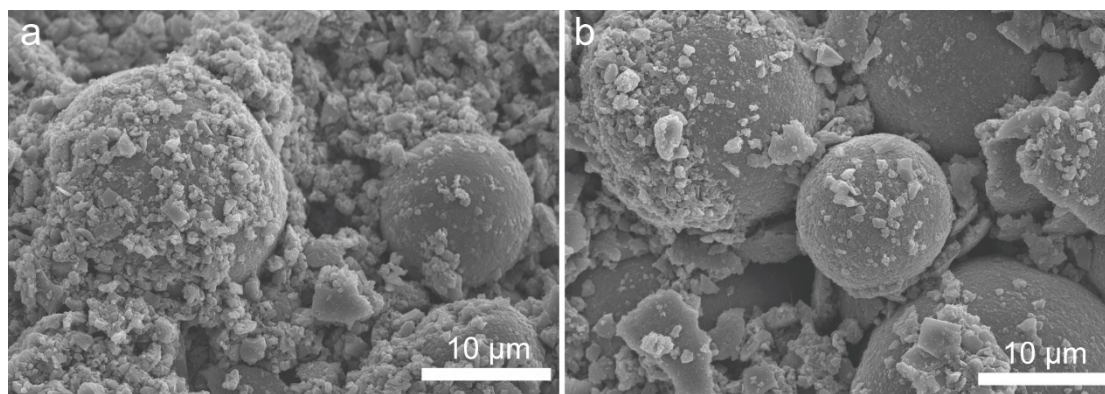

Fig. S2 The high magnification SEM images of (a)  $\text{SiO}_x/\text{asphalt}$  membrane and (b) binder-free  $\text{SiO}_x/\text{C}@\text{Ni}$  after high temperature (900 °C) pyrolysis.

Table S1. Summary of electrochemical performances of different SiO<sub>x</sub>-based anodes.

| Sample                 | Mass loading<br>(mg cm <sup>-2</sup> ) | Initial                                    | ICE | Reversible                                                 | Capacity retention | Reference |
|------------------------|----------------------------------------|--------------------------------------------|-----|------------------------------------------------------------|--------------------|-----------|
|                        |                                        | charge capacity<br>(mA h g <sup>-1</sup> ) |     | capacity<br>(mA h g <sup>-1</sup> )<br>after (X)<br>cycles |                    |           |
| SiO <sub>x</sub> /CNTs | 1                                      | 687                                        |     | 453 (100)                                                  | 66%                | Ref. S1   |
| SGF                    | 2.4                                    | 477                                        | 62% | 448 (500)                                                  | 94%                | Ref. S2   |
| SiO <sub>x</sub>       | 0.8                                    | 1087                                       | 62% | 760 (400)                                                  | 70%                | Ref. S3   |
| SiO <sub>x</sub> /C    | -                                      | 647                                        | 44% | 540 (200)                                                  | 83%                | Ref. S4   |
| SiO <sub>x</sub> /C/G  | 3                                      | 600                                        | 85% | 541 (600)                                                  | 90%                | Our work  |

[S1] H. Ming, J. Qiu, S. Zhang, M. Li, X. Zhu, L. Wang and J. Ming, *ChemElectroChem*, 2017, **4**, 1165-1171.

[S2] N. H. Yang, Y. S. Wu, J. Chou, H. C. Wu, N. L. Wu, *J. Power Sources*, 2015, **296**, 314-317.

[S3] L. Sun, T. Su, L. Xu, M. Liu, H. B. Du, *Chem. Commun.*, 2016, **52**, 4341-4344.

[S4] Z. Sun, X. Wang, T. Cai, Z. Meng, W. Q. Han, *RSC Adv.*, 2016, **6**, 40799-40805.
